# Supplementary material for: Long term tapering versus standard prednisolone treatment for first episode of childhood nephrotic syndrome: phase III randomised controlled trial and economic evaluation
Source: PubMed Central journal article supplement — BMJ. 2019 May 23;365:l1800. doi: 10.1136/bmj.l1800 (PMC6531851; doi:10.1136/bmj.l1800), 2019-05-23
Supplement: webn047920.ww2.pdf [file webn047920.ww2.pdf]

| <b>PREDNOS Trial Management Group</b>                                                                                                                                                                                                  |                                                            |
|----------------------------------------------------------------------------------------------------------------------------------------------------------------------------------------------------------------------------------------|------------------------------------------------------------|
| <p>Professor Nicholas Webb<br/> Central Manchester University Hospitals NHS<br/> Foundation Trust<br/> (Royal Manchester Children's Hospital)<br/> Email: <a href="mailto:Nicholas.Webb@cmft.nhs.uk">Nicholas.Webb@cmft.nhs.uk</a></p> | <p>Chief Investigator, Applicant</p>                       |
| <p>Dr Richard Trompeter<br/> Centre for Nephrology, University College,<br/> London</p>                                                                                                                                                | <p>Co-Chief Investigator, Co-Applicant<br/> Nephrology</p> |
| <p>Professor Keith Wheatley<br/> University of Birmingham<br/> (Cancer Research UK Clinical Trials Unit)</p>                                                                                                                           | <p>Co-Applicant<br/> Clinical Trials</p>                   |
| <p>Dr Carole Cummins<br/> University of Birmingham<br/> (Institute of Applied Health Research)</p>                                                                                                                                     | <p>Co-Applicant<br/> Clinical Trials &amp; Statistics</p>  |
| <p>Miss Natalie Ives<br/> University of Birmingham<br/> (Birmingham Clinical Trials Unit)</p>                                                                                                                                          | <p>Co-Applicant<br/> Clinical Trials &amp; Statistics</p>  |
| <p>Dr Emma Frew<br/> University of Birmingham<br/> (Institute of Applied Health Research)</p>                                                                                                                                          | <p>Co-Applicant<br/> Health Economics</p>                  |

| <b>PREDNOS Trial Management and Day to Day Coordination</b>      |                           |
|------------------------------------------------------------------|---------------------------|
| <b>Birmingham Clinical Trials Unit, University of Birmingham</b> |                           |
| Elizabeth Brettell                                               | Team Leader               |
| Emma Barsoum                                                     | Senior Trial Coordinator  |
| Helen Bodenham-Chilton                                           | Trial Coordinator         |
| Noreen Akhtar                                                    | Trial Administrator       |
| Charmaine Hunt (previously Meek)                                 | Trial Administrator       |
| Terry Hughes                                                     | Data Manager              |
| Adam Khan                                                        | Data Manager              |
| Nicholas Hilken                                                  | Programming Team Leader   |
| Neil Winkles                                                     | Senior Analyst Programmer |
| Adrian Wilcockson                                                | Senior Analyst Programmer |
| Mark Hunter                                                      | Analyst Programmer        |

| <b>PREDNOS Trial Statistics</b>                                  |                        |
|------------------------------------------------------------------|------------------------|
| <b>Birmingham Clinical Trials Unit, University of Birmingham</b> |                        |
| Natalie Ives                                                     | Statistics Team Leader |
| Rebecca Woolley                                                  | Trial Statistician     |
| Andrew Howman                                                    | Trial Statistician     |
| Natalie Marchevsky                                               | Statistician           |

| <b>PREDNOS Trial Health Economics</b>                                             |                                                                    |
|-----------------------------------------------------------------------------------|--------------------------------------------------------------------|
| Emma Frew<br>University of Birmingham<br>(Institute of Applied Health Research)   | Health Economics Lead                                              |
| Tosin Lambe<br>University of Birmingham<br>(Institute of Applied Health Research) | Health Economics                                                   |
| Associated Professor Billingsley Kaambwa<br>Flinders University                   | Health Economics (original Health Economics Lead and co-applicant) |

|                      |  |
|----------------------|--|
| (School of Medicine) |  |
|----------------------|--|

|                                                                                         |                                                                                  |
|-----------------------------------------------------------------------------------------|----------------------------------------------------------------------------------|
| <b>Participating centres and PREDNOS collaborative group members</b>                    |                                                                                  |
| <b>Abertawe Bro Morgannwg University Health Board</b>                                   |                                                                                  |
| Morrison Hospital                                                                       |                                                                                  |
| Dr Michelle James-Ellison                                                               | Principal Investigator                                                           |
| Hilary Marie Williams                                                                   | Research Nurse                                                                   |
| <b>Airedale NHS Foundation Trust</b>                                                    |                                                                                  |
| Airedale General Hospital                                                               |                                                                                  |
| Dr Pronab Bala                                                                          | Principal Investigator                                                           |
| <b>Alder Hey Children's NHS Foundation Trust</b>                                        |                                                                                  |
| Alder Hey Children's Hospital                                                           |                                                                                  |
| Dr Caroline Jones                                                                       | Principal Investigator                                                           |
| Dr Richard Holt                                                                         | Clinician                                                                        |
| Dr Henry Morgan                                                                         | Clinician                                                                        |
| Elizabeth Bailey                                                                        | Research Nurse                                                                   |
| Lauren Flanagan                                                                         | Data Manager                                                                     |
| <b>Ashford and St Peter's Hospitals NHS Foundation Trust</b>                            |                                                                                  |
| St Peter's Hospital                                                                     |                                                                                  |
| Dr Tariq Bhatti                                                                         | Principal Investigator                                                           |
| Dr Shailini Bahl                                                                        | Clinician                                                                        |
| Lorna Walding                                                                           | Research Nurse                                                                   |
| <b>Barnsley Hospital NHS Foundation Trust</b>                                           |                                                                                  |
| Barnsley Hospital                                                                       |                                                                                  |
| Dr Ezzedin Gouta                                                                        | Principal Investigator                                                           |
| Dr Rajeev Gupta                                                                         | Clinician                                                                        |
| Dr Diarmuid Kerrin                                                                      | Clinician                                                                        |
| <b>Barts Health NHS Trust</b>                                                           |                                                                                  |
| Newham University Hospital, The Royal London Hospital, Whipps Cross University Hospital |                                                                                  |
| Dr Ami Parikh                                                                           | Principal Investigator                                                           |
| Dr Ann Duthie                                                                           | Previous Principal Investigator; Clinician<br>(Whipps Cross University Hospital) |

|                                                                        |                                                                            |
|------------------------------------------------------------------------|----------------------------------------------------------------------------|
| Dr Nimze Gadong                                                        | Previous Principal Investigator; Clinician<br>(Newham University Hospital) |
| Dr Bahadur Anjum                                                       | Clinician (Newham University Hospital)                                     |
| Bessie Crone                                                           | Research Nurse                                                             |
| Hilarious De Jesus                                                     | Research Nurse (The Royal London<br>Hospital)                              |
| Ivone Lancoma-Malcolm                                                  | Research Nurse (Newham University<br>Hospital)                             |
| Nicolene Plaatjies                                                     | Research Nurse (Newham University<br>Hospital, The Royal London Hospital)  |
| <b>Basildon and Thurrock University Hospitals NHS Foundation Trust</b> |                                                                            |
| Basildon University Hospital                                           |                                                                            |
| Dr Khorshid Khalifa                                                    | Principal Investigator                                                     |
| <b>Belfast Health and Social Care Trust</b>                            |                                                                            |
| The Royal Belfast Hospital for Sick Children                           |                                                                            |
| Dr Karl McKeever                                                       | Principal Investigator                                                     |
| Dr Grace McCall                                                        | Clinician                                                                  |
| Patricia McCreesh                                                      | Research Nurse                                                             |
| Muriel Millar                                                          | Research Nurse                                                             |
| <b>Betsi Cadwaladr University Health Board</b>                         |                                                                            |
| Glan Clwyd Hospital, Ysbyty Gwynedd                                    |                                                                            |
| Dr Markus Hesselning                                                   | Principal Investigator (Glan Clwyd<br>Hospital)                            |
| Dr Madalitso Kubwalo                                                   | Principal Investigator (Ysbyty Gwynedd)                                    |
| Annette Bolger                                                         | Research Officer                                                           |
| Lucie Hobson                                                           | Research Nurse                                                             |
| <b>Birmingham Women's and Children's NHS Foundation Trust</b>          |                                                                            |
| Birmingham Children's Hospital                                         |                                                                            |
| Dr David Milford                                                       | Principal Investigator                                                     |
| Dr Larissa Kerecuk                                                     | Clinician                                                                  |

|                                                            |                                            |
|------------------------------------------------------------|--------------------------------------------|
| Claire Norton                                              | Central Pharmacist                         |
| Narinder Rahania                                           | Central Pharmacist                         |
| Helen Williamson                                           | Central Pharmacist                         |
| Fatima Bibi                                                | Central Pharmacy Clinical Trials Assistant |
| Tracy Gazeley                                              | Central Pharmacy Technician                |
| Julie Williams                                             | Central Pharmacy Technician                |
| <b>Bolton NHS Foundation Trust</b>                         |                                            |
| Royal Bolton Hospital                                      |                                            |
| Dr Fiona Watson                                            | Principal Investigator                     |
| Claire Abbot                                               | Research Nurse                             |
| <b>Bradford Teaching Hospitals NHS Foundation Trust</b>    |                                            |
| Bradford Royal Infirmary                                   |                                            |
| Dr Simon Frazer                                            | Principal Investigator                     |
| Louise Akeroyd                                             | Research Nurse                             |
| <b>Burton Hospitals NHS Foundation Trust</b>               |                                            |
| Queen's Hospital                                           |                                            |
| Dr Mansoor Ahmed                                           | Principal Investigator                     |
| Dr Dominic Muogbo                                          | Clinician                                  |
| Claire Backhouse                                           | Research Nurse                             |
| Stephanie Boswell                                          | Research Nurse                             |
| <b>Calderdale and Huddersfield NHS Foundation Trust</b>    |                                            |
| Calderdale Royal Hospital, Huddersfield Royal Infirmary    |                                            |
| Dr Eilean Crosbie                                          | Principal Investigator                     |
| <b>Cambridge University Hospitals NHS Foundation Trust</b> |                                            |
| Addenbrooke's Hospital                                     |                                            |
| Dr Peter Heinz                                             | Principal Investigator                     |
| Dr Birgit Ulbrich                                          | Clinician                                  |
| <b>Cardiff and Vales University Health Board</b>           |                                            |
| University Hospital of Wales                               |                                            |
| Dr Shivaram Hegde                                          | Principal Investigator                     |

|                                                                     |                                            |
|---------------------------------------------------------------------|--------------------------------------------|
| Pauline Jones                                                       | Research Nurse                             |
| <b>Central Manchester University Hospitals NHS Foundation Trust</b> |                                            |
| Royal Manchester Children's Hospital                                |                                            |
| Professor Nicholas JA Webb                                          | Chief Investigator; Principal Investigator |
| Dr Rachel Lennon                                                    | Clinician; Laboratory                      |
| Dr Malcolm Lewis                                                    | Clinician                                  |
| Dr Nicholas Plant                                                   | Clinician                                  |
| Dr Mohan Shenoy                                                     | Clinician                                  |
| Dr Shaila Sukthankar                                                | Clinician                                  |
| Charlotte Bryant                                                    | Research Coordinator                       |
| Sarah Douglas                                                       | Research Coordinator                       |
| Helen Sumner                                                        | Research Coordinator                       |
| Jane Howell                                                         | Research Nurse                             |
| <b>Chelsea and Westminster Hospital NHS Foundation Trust</b>        |                                            |
| West Middlesex University Hospital                                  |                                            |
| Dr Nour Elhadi                                                      | Principal Investigator                     |
| Irene Bishton                                                       | Research Nurse                             |
| <b>Chesterfield Royal Hospital NHS Foundation Trust</b>             |                                            |
| Chesterfield Royal Hospital                                         |                                            |
| Dr Oyekunle Ayonrinde                                               | Principal Investigator                     |
| <b>Colchester Hospital University NHS Foundation Trust</b>          |                                            |
| Colchester General Hospital                                         |                                            |
| Dr Andrea Turner                                                    | Principal Investigator                     |
| Dr Jonathan Campbell                                                | Clinician                                  |
| Aine Turner                                                         | Research Nurse                             |
| <b>Countess of Chester Hospital NHS Foundation Trust</b>            |                                            |
| Countess of Chester Hospital                                        |                                            |
| Dr John Gibbs                                                       | Principal Investigator                     |
| Dr Elizabeth Newby                                                  | Clinician                                  |
| Dr Satyanarayana Saladi                                             | Clinician                                  |

|                                                                        |                                 |
|------------------------------------------------------------------------|---------------------------------|
| Dr Alison Timmis                                                       | Clinician                       |
| Caroline Burchett                                                      | Research Nurse                  |
| Sarah De-Beger                                                         | Research Assistant              |
| <b>County Durham and Darlington NHS Foundation Trust</b>               |                                 |
| Darlington Memorial Hospital, University Hospital of North Durham      |                                 |
| Dr Asha Nair                                                           | Principal Investigator          |
| Dr Antima Banerjee                                                     | Clinician                       |
| <b>Croydon Health Services NHS Trust</b>                               |                                 |
| Croydon University Hospital                                            |                                 |
| Dr Theo Fenton                                                         | Principal Investigator          |
| <b>Dartford and Gravesham NHS Trust</b>                                |                                 |
| Darent Valley Hospital                                                 |                                 |
| Dr Selwyn D'Costa                                                      | Principal Investigator          |
| <b>Derby Teaching Hospitals NHS Foundation Trust</b>                   |                                 |
| Royal Derby Hospital                                                   |                                 |
| Dr Richard Bowker                                                      | Principal Investigator          |
| Coral Smith                                                            | Research Nurse                  |
| Vanessa Unsworth                                                       | Research Nurse                  |
| <b>Doncaster and Bassetlaw Teaching Hospitals NHS Foundation Trust</b> |                                 |
| Bassetlaw Hospital, Doncaster Royal Infirmary                          |                                 |
| Dr Anuja Natarajan                                                     | Principal Investigator          |
| Dr Lai Men Wong                                                        | Clinician                       |
| <b>Dorset County Hospital NHS Foundation Trust</b>                     |                                 |
| Dorset County Hospital                                                 |                                 |
| Dr Phil Parslow                                                        | Principal Investigator          |
| <b>East and North Hertfordshire NHS Trust</b>                          |                                 |
| Lister Hospital                                                        |                                 |
| Dr Vijay Kandala                                                       | Principal Investigator          |
| Dr Salman Imran                                                        | Previous Principal Investigator |
| <b>East Cheshire NHS Trust</b>                                         |                                 |



|                                                                       |                                    |
|-----------------------------------------------------------------------|------------------------------------|
| Macclesfield District General Hospital                                |                                    |
| Dr Surendran Chandrasekaran                                           | Principal Investigator             |
| Dr Sheng-Ang Ho                                                       | Previous Principal Investigator    |
| Dr Ignatius Losa                                                      | Clinician                          |
| Dr Katrina Marinaki                                                   | Clinician                          |
| Natalie Keenan                                                        | Research Nurse                     |
| Jessica Nichols                                                       | Research Nurse                     |
| Joanne Shippey                                                        | Research Nurse                     |
| <b>East Lancashire Hospitals NHS Trust</b>                            |                                    |
| Royal Blackburn Hospital                                              |                                    |
| Dr Javed Iqbal                                                        | Principal Investigator             |
| <b>Epsom and St Helier University Hospitals NHS Trust</b>             |                                    |
| Epsom Hospital                                                        |                                    |
| Dr Kirsty Watts                                                       | Principal Investigator             |
| <b>Frimley Health NHS Foundation Trust</b>                            |                                    |
| Wexham Park Hospital                                                  |                                    |
| Dr Angela Yannoulis                                                   | Principal Investigator             |
| Dr Zilla Huma                                                         | Previous Principal Investigator    |
| <b>Gloucestershire Hospitals NHS Foundation Trust</b>                 |                                    |
| Gloucestershire Royal Hospital                                        |                                    |
| Dr Adamu Sambo                                                        | Principal Investigator             |
| Dr Lyda Jadresic                                                      | Previous Principal Investigator    |
| Susan Beames                                                          | Research Nurse                     |
| <b>Great Ormond Street Hospital for Children NHS Foundation Trust</b> |                                    |
| Great Ormond Street Hospital                                          |                                    |
| Dr Detlef Bockenhauer                                                 | Principal Investigator; Laboratory |
| Dr Daljit Hothi                                                       | Previous Principal Investigator    |
| <b>Great Western Hospitals NHS Foundation Trust</b>                   |                                    |
| Great Western Hospital                                                |                                    |
| Dr Nick West                                                          | Principal Investigator             |

|                                                           |                                 |
|-----------------------------------------------------------|---------------------------------|
| Dr Helen Price                                            | Previous Principal Investigator |
| <b>Guy's and St Thomas' NHS Foundation Trust</b>          |                                 |
| Evelina London Children's Hospital                        |                                 |
| Dr Manish Sinha                                           | Principal Investigator          |
| Emma Neal                                                 | Research Nurse                  |
| Elisabeth Reus                                            | Research Nurse                  |
| Paula Sofocleous                                          | Research Nurse                  |
| <b>Harrogate and District NHS Foundation Trust</b>        |                                 |
| Harrogate District Hospital                               |                                 |
| Dr Ian Cannings                                           | Principal Investigator          |
| <b>Homerton University Hospital NHS Foundation Trust</b>  |                                 |
| Homerton University Hospital                              |                                 |
| Dr Rajiv Sood                                             | Principal Investigator          |
| <b>Hull and East Yorkshire Hospitals NHS Trust</b>        |                                 |
| Hull Royal Infirmary                                      |                                 |
| Dr Verghese Mathew                                        | Principal Investigator          |
| Dr Elsadeq Sharif                                         | Previous Principal Investigator |
| <b>Kettering General Hospital NHS Foundation Trust</b>    |                                 |
| Kettering General Hospital                                |                                 |
| Dr Harsha Bilollikar                                      | Principal Investigator          |
| Sonia White                                               | Research Nurse                  |
| <b>Kingston Hospital NHS Foundation Trust</b>             |                                 |
| Kingston Hospital                                         |                                 |
| Dr Titi Ayeni                                             | Principal Investigator          |
| <b>Lancashire Teaching Hospitals NHS Foundation Trust</b> |                                 |
| Royal Preston Hospital                                    |                                 |
| Dr Ruth O'Connor                                          | Principal Investigator          |
| <b>Luton and Dunstable Hospital NHS Foundation Trust</b>  |                                 |
| Luton and Dunstable University Hospital                   |                                 |
| Dr Michael Eisenhut                                       | Principal Investigator          |

|                                                    |                           |
|----------------------------------------------------|---------------------------|
| Dr Tomasz Rajkowski                                | Clinician                 |
| Samantha Clough                                    | Research Nurse            |
| Rebecca Dixon                                      | Research Nurse            |
| Karen Reep                                         | Research Nurse            |
| <b>Maidstone and Tunbridge Wells NHS Trust</b>     |                           |
| Maidstone Hospital, Tunbridge Wells Hospital       |                           |
| Dr Krishnan Balasubramanian                        | Principal Investigator    |
| Dr Hamudi Kisat                                    | Clinician                 |
| <b>Medway NHS Foundation Trust</b>                 |                           |
| Medway Maritime Hospital                           |                           |
| Dr Janette Cansick                                 | Principal Investigator    |
| <b>Mid Cheshire Hospitals NHS Foundation Trust</b> |                           |
| Leighton Hospital                                  |                           |
| Dr Julie Ellison                                   | Principal Investigator    |
| Sally Smith                                        | Research Nurse            |
| Samantha Tapscott                                  | Research Nurse            |
| <b>NHS Ayrshire and Arran</b>                      |                           |
| University Hospital Crosshouse                     |                           |
| Dr Bridget Oates                                   | Principal Investigator    |
| Claire Bell                                        | Research Nurse            |
| <b>NHS Dumfries &amp; Galloway</b>                 |                           |
| Dumfries and Galloway Royal Infirmary              |                           |
| Dr Rajendran Shyam                                 | Principal Investigator    |
| <b>NHS Fife</b>                                    |                           |
| Victoria Hospital                                  |                           |
| Dr Evelyn Menzies                                  | Principal Investigator    |
| Pamela Cruickshanks                                | Clinical Nurse Specialist |
| <b>NHS Forth Valley</b>                            |                           |
| Forth Valley Royal Hospital                        |                           |
| Dr John Schulga                                    | Principal Investigator    |

|                                                       |                                                               |
|-------------------------------------------------------|---------------------------------------------------------------|
| <b>NHS Grampian</b>                                   |                                                               |
| Royal Aberdeen Children's Hospital                    |                                                               |
| Dr Craig Oxley                                        | Principal Investigator                                        |
| <b>NHS Greater Glasgow and Clyde</b>                  |                                                               |
| Royal Alexandra Hospital, Royal Hospital for Children |                                                               |
| Dr David Hughes                                       | Principal Investigator (Royal Hospital for Children)          |
| Dr Amita Sharma                                       | Principal Investigator (Royal Alexandra Hospital)             |
| Dr Leah Krischock                                     | Previous Principal Investigator (Royal Hospital for Children) |
| Dr Jamie Houston                                      | Clinician (Royal Alexandra Hospital)                          |
| Diane Carroll                                         | Research Nurse (Royal Hospital for Children)                  |
| Sheryl Goddard                                        | Research Nurse (Royal Hospital for Children)                  |
| Elizabeth Waxman                                      | Research Nurse                                                |
| <b>NHS Highland</b>                                   |                                                               |
| Raigmore Hospital                                     |                                                               |
| Dr Alan Webb                                          | Principal Investigator                                        |
| <b>NHS Lanarkshire</b>                                |                                                               |
| Wishaw General Hospital                               |                                                               |
| Dr Thin Thin Saing                                    | Principal Investigator                                        |
| Dr Colin Cunningham                                   | Clinician                                                     |
| Angela Brown                                          | Research Nurse                                                |
| Victoria Causer                                       | Clinical Nurse Specialist                                     |
| <b>NHS Lothian</b>                                    |                                                               |
| Royal Hospital for Sick Children                      |                                                               |
| Dr David Hughes                                       | Principal Investigator                                        |
| Dr Sepideh Taheri                                     | Previous Principal Investigator                               |

|                                                                      |                                            |
|----------------------------------------------------------------------|--------------------------------------------|
| Alyson Macdonald                                                     | Clinical Nurse Specialist                  |
| Tracey McGregor                                                      | Clinical Nurse Specialist                  |
| Emma Carson                                                          | Research Nurse                             |
| Kay Riding                                                           | Research Nurse                             |
| <b>Norfolk and Norwich University Hospitals NHS Foundation Trust</b> |                                            |
| Norfolk and Norwich University Hospital                              |                                            |
| Dr Nandu Thalange                                                    | Principal Investigator                     |
| Dr Chris Upton                                                       | Previous Principal Investigator; Clinician |
| Louisa Fear                                                          | Research Nurse                             |
| <b>North Cumbria University Hospitals NHS Trust</b>                  |                                            |
| Cumberland Infirmary                                                 |                                            |
| Dr Glyn Jones                                                        | Principal Investigator                     |
| <b>North Tees and Hartlepool NHS Foundation Trust</b>                |                                            |
| University Hospital of North Tees                                    |                                            |
| Dr Vijay Tandle                                                      | Principal Investigator                     |
| Gabrielle Osborne                                                    | Research Nurse                             |
| <b>North West Anglia NHS Foundation Trust</b>                        |                                            |
| Peterborough City Hospital                                           |                                            |
| Dr Mona Aslam                                                        | Principal Investigator                     |
| <b>Northampton General Hospital NHS Trust</b>                        |                                            |
| Northampton General Hospital                                         |                                            |
| Dr Imogen Norton                                                     | Principal Investigator                     |
| <b>Northern Devon Healthcare NHS Trust</b>                           |                                            |
| North Devon District Hospital                                        |                                            |
| Dr Dermot Dalton                                                     | Principal Investigator                     |
| Dr Andrew Arend                                                      | Previous Principal Investigator            |
| Dr Krishnakumar Thattakkat                                           | Previous Principal Investigator            |
| <b>Northern Lincolnshire and Goole NHS Foundation Trust</b>          |                                            |
| Diana, Princess of Wales Hospital                                    |                                            |
| Dr Bukar Wobi                                                        | Principal Investigator                     |

|                                                         |                                 |
|---------------------------------------------------------|---------------------------------|
| Dr Bemigho Etuwewe                                      | Clinician                       |
| Tara Walker                                             | Data Manager                    |
| Julie Browning                                          | Research Nurse                  |
| Marjorie Carling                                        | Research Nurse                  |
| Emma Killingbeck                                        | Research Nurse                  |
| Dorothy Ryan                                            | Research Nurse                  |
| Consolata Tsvangirai-Mahachi                            | Research Nurse                  |
| <b>Nottingham University Hospitals NHS Trust</b>        |                                 |
| Nottingham Children's Hospital                          |                                 |
| Dr Andrew Lunn                                          | Principal Investigator          |
| Dr Martin Christian                                     | Clinician                       |
| <b>Oxford University Hospitals NHS Foundation Trust</b> |                                 |
| John Radcliffe Hospital                                 |                                 |
| Dr Janet Craze                                          | Principal Investigator          |
| <b>Plymouth Hospitals NHS Trust</b>                     |                                 |
| Derriford Hospital                                      |                                 |
| Dr Catherine Derry                                      | Principal Investigator          |
| Dr Robert Jones                                         | Previous Principal Investigator |
| Sarah-Jane Sharman                                      | Research Nurse                  |
| Sally Harwood                                           | Trial Administrator             |
| <b>Poole Hospital NHS Foundation Trust</b>              |                                 |
| Poole Hospital                                          |                                 |
| Dr Steve Wadams                                         | Principal Investigator          |
| Heather Barham                                          | Research Nurse                  |
| Susan Power                                             | Research Nurse                  |
| <b>Portsmouth Hospitals NHS Trust</b>                   |                                 |
| Queen Alexandra Hospital                                |                                 |
| Dr Catherine Tuffrey                                    | Principal Investigator          |
| Dr Simon Birch                                          | Clinician                       |
| Dr Judith Scanlan                                       | Clinician                       |

|                                                             |                                 |
|-------------------------------------------------------------|---------------------------------|
| Andrew Gribbin                                              | Research Nurse                  |
| Sharon McCready                                             | Research Nurse                  |
| <b>Royal Berkshire NHS Foundation Trust</b>                 |                                 |
| Royal Berkshire Hospital                                    |                                 |
| Dr Ann Gordon                                               | Principal Investigator          |
| Dr Gregory Boden                                            | Previous Principal Investigator |
| Susan Hallett                                               | Research Nurse                  |
| <b>Royal Cornwall Hospitals NHS Trust</b>                   |                                 |
| Royal Cornwall Hospital                                     |                                 |
| Dr Chris Williams                                           | Principal Investigator          |
| Gillian Craig                                               | Research Nurse                  |
| <b>Royal Devon and Exeter Hospital NHS Foundation Trust</b> |                                 |
| Royal Devon and Exeter- Wonford Hospital                    |                                 |
| Dr Hannah Cottis                                            | Principal Investigator          |
| Dr Vaughan Lewis                                            | Previous Principal Investigator |
| Dr Christine McMillan                                       | Clinician                       |
| Dr Nigel Osborne                                            | Clinician                       |
| Caroline Harrill                                            | Research Nurse                  |
| Suzanne Wilkins                                             | Research Nurse                  |
| <b>Royal Free London NHS Foundation Trust</b>               |                                 |
| Royal Free Hospital (non-recruiting centre)                 |                                 |
| Professor Robert Kleta                                      | Laboratory                      |
| <b>Royal United Hospitals Bath NHS Foundation Trust</b>     |                                 |
| Royal United Hospital                                       |                                 |
| Dr Lynn Diskin                                              | Principal Investigator          |
| Dr Amanda Billson                                           | Previous Principal Investigator |
| Alison Barratt                                              | Research Nurse                  |
| <b>Sheffield Children's NHS Foundation Trust</b>            |                                 |
| Sheffield Children's Hospital                               |                                 |
| Dr Gail Moss                                                | Principal Investigator          |

**Sherwood Forest Hospitals NHS Foundation Trust**

King's Mill Hospital

|                 |                        |
|-----------------|------------------------|
| Dr Simon Rhodes | Principal Investigator |
| Anna Coupe      | Research Officer       |
| Caroline Moulds | Research Nurse         |

**Southern Health and Social Care Trust**

Craigavon Area Hospital

|                  |                        |
|------------------|------------------------|
| Michael Smith    | Principal Investigator |
| Sara Gilpin      | Research Nurse         |
| Judith Ratcliffe | Research Nurse         |

**Southport and Ormskirk Hospital NHS Trust**

Ormskirk and District General Hospital

|                    |                        |
|--------------------|------------------------|
| Dr Sharryn Gardner | Principal Investigator |
|--------------------|------------------------|

**St Helens and Knowsley Teaching Hospitals NHS Trust**

Whiston Hospital

|                      |                        |
|----------------------|------------------------|
| Dr Lakshmi Chilukuri | Principal Investigator |
|----------------------|------------------------|

**Stockport NHS Foundation Trust**

Stepping Hill Hospital

|                 |                        |
|-----------------|------------------------|
| Dr Chris Cooper | Principal Investigator |
| Sara Bennett    | Research Nurse         |

**Tameside and Glossop Integrated Care NHS Foundation Trust**

Tameside Hospital

|                  |                        |
|------------------|------------------------|
| Dr Anjali Petkar | Principal Investigator |
| Dr Ahsan Ul-Haq  | Clinician              |
| Gill Waring      | Research Nurse         |

**Taunton and Somerset NHS Foundation Trust**

Musgrove Park Hospital

|                 |                        |
|-----------------|------------------------|
| Dr Rebecca Mann | Principal Investigator |
| Nicola Thorne   | Research Nurse         |

**The Dudley Group NHS Foundation Trust**



|                                                                      |                                                      |
|----------------------------------------------------------------------|------------------------------------------------------|
| Russells Hall Hospital                                               |                                                      |
| Dr Zala Ibrahim                                                      | Principal Investigator                               |
| <b>The Ipswich Hospital NHS Trust</b>                                |                                                      |
| Ipswich Hospital                                                     |                                                      |
| Dr Jackie Buck                                                       | Principal Investigator                               |
| Deborah Beeby                                                        | Research Nurse                                       |
| <b>The Leeds Teaching Hospitals NHS Trust</b>                        |                                                      |
| Leeds General Infirmary                                              |                                                      |
| Dr Eric Finlay                                                       | Principal Investigator                               |
| Majorie Allen                                                        | Research Nurse                                       |
| Rebecca Mottram                                                      | Research Nurse                                       |
| <b>The Mid Yorkshire Hospitals NHS Trust</b>                         |                                                      |
| Dewsbury and District Hospital, Pinderfields Hospital                |                                                      |
| Dr Kathryn Deakin                                                    | Principal Investigator                               |
| <b>The Newcastle upon Tyne Hospitals NHS Foundation Trust</b>        |                                                      |
| Great North Children's Hospital                                      |                                                      |
| Dr Sally Johnson                                                     | Principal Investigator                               |
| Dr Yincent Tse                                                       | Clinician                                            |
| Kathryn Bell                                                         | Research Nurse                                       |
| Denise Chisholm                                                      | Clinical Nurse Specialist                            |
| <b>The Pennine Acute Hospitals NHS Trust</b>                         |                                                      |
| North Manchester General Hospital, The Royal Oldham Hospital         |                                                      |
| Dr Beena Padmakumar                                                  | Principal Investigator                               |
| Dr Talaivirichan Magadevan                                           | <b>Clinician (North Manchester General Hospital)</b> |
| <b>The Queen Elizabeth Hospital King's Lynn NHS Foundation Trust</b> |                                                      |
| Queen Elizabeth Hospital                                             |                                                      |
| Dr Mandy Hughes                                                      | Principal Investigator                               |
| Dr Susan Rubin                                                       | Previous Principal Investigator                      |
| Amy Frary                                                            | Research Nurse                                       |

**The Rotherham NHS Foundation Trust**

Rotherham Hospital

|                       |                                 |
|-----------------------|---------------------------------|
| Dr Sanjay Suri        | Principal Investigator          |
| Dr Sherif El-Refée    | Previous Principal Investigator |
| Dr Christine Harrison | Clinician                       |

**The Royal Wolverhampton NHS Trust**

Cannock Chase Hospital, New Cross Hospital

|                 |                        |
|-----------------|------------------------|
| Dr Karen Davies | Principal Investigator |
| Sharon Kempson  | Research Nurse         |

**The Shrewsbury and Telford Hospital NHS Trust**

Princess Royal Hospital, Royal Shrewsbury Hospital

|               |                        |
|---------------|------------------------|
| Dr Naeem Ayub | Principal Investigator |
|---------------|------------------------|

**United Lincolnshire Hospitals NHS Trust**

Lincoln County Hospital, Pilgrim Hospital

|                         |                                                    |
|-------------------------|----------------------------------------------------|
| Dr Sourabh Mukhopadhyay | Principal Investigator (Lincoln County Hospital)   |
| Dr Margaret Crawford    | Principal Investigator (Pilgrim Hospital)          |
| Dr Mujeeb Pervez        | Previous Principal Investigator (Pilgrim Hospital) |
| Dr Douglas Thomas       | Clinician (Lincoln County Hospital)                |

**University Hospital of South Manchester NHS Foundation Trust**

Wythenshawe Hospital

|                       |                                 |
|-----------------------|---------------------------------|
| Dr Gopikrishna Vemuri | Principal Investigator          |
| Dr Radhika Puttha     | Previous Principal Investigator |
| Dr Alice Setti        | Previous Principal Investigator |
| Dr Faisal Al-Zidgali  | Clinician                       |
| Claire Holliday       | Research Nurse                  |
| Louise Woodhead       | Research Nurse                  |

**University Hospital Southampton NHS Foundation Trust**

Southampton Children's Hospital

|                                                                   |                                                                   |
|-------------------------------------------------------------------|-------------------------------------------------------------------|
| <b>Rodney Gilbert</b>                                             | Principal Investigator                                            |
| <b>University Hospitals Bristol NHS Foundation Trust</b>          |                                                                   |
| Bristol Royal Hospital for Children                               |                                                                   |
| Professor Moin Saleem                                             | Principal Investigator                                            |
| Dr Alison Kelly                                                   | Clinician                                                         |
| Michelle Ross                                                     | Research Nurse                                                    |
| Heather Smee                                                      | Research Nurse                                                    |
| <b>University Hospitals Coventry and Warwickshire NHS Trust</b>   |                                                                   |
| University Hospital                                               |                                                                   |
| Dr Nigel Coad                                                     | Principal Investigator                                            |
| <b>University Hospitals of Leicester NHS Trust</b>                |                                                                   |
| Leicester Royal Infirmary                                         |                                                                   |
| Dr Angela Hall                                                    | Principal Investigator                                            |
| Dr Peter Houtman                                                  | Previous Principal Investigator                                   |
| <b>University Hospitals of Morecambe Bay NHS Foundation Trust</b> |                                                                   |
| Furness General Hospital, Royal Lancaster Infirmary               |                                                                   |
| Dr Nayan Peepah Nardeosingh                                       | Principal Investigator                                            |
| Dr Mireille-Yvette Formosa                                        | Previous Principal Investigator                                   |
| Dr Patrick Ward                                                   | Previous Principal Investigator                                   |
| <b>University Hospitals of North Midlands NHS Trust</b>           |                                                                   |
| County Hospital, Royal Stoke University Hospital                  |                                                                   |
| Dr Yvonne Slater                                                  | Principal Investigator                                            |
| Dr Saeeda Raja                                                    | Previous Principal Investigator (County Hospital)                 |
| Dr Kishor Tewary                                                  | Previous Principal Investigator (County Hospital)                 |
| Dr Shiva Shankar                                                  | Previous Principal Investigator (Royal Stoke University Hospital) |
| <b>Warrington and Halton Hospitals NHS Foundation Trust</b>       |                                                                   |
| Warrington Hospital                                               |                                                                   |

|                                                                 |                                                     |
|-----------------------------------------------------------------|-----------------------------------------------------|
| Dr Rachel Delyth Webb                                           | Principal Investigator                              |
| Natalie Rogers                                                  | Research Nurse                                      |
| <b>West Suffolk NHS Foundation Trust</b>                        |                                                     |
| West Suffolk Hospital                                           |                                                     |
| Dr Raman Lakshman                                               | Principal Investigator                              |
| Dr Karine Cesar                                                 | Clinician                                           |
| <b>Western Health and Social Care Trust</b>                     |                                                     |
| Altnagelvin Area Hospital                                       |                                                     |
| Dr Damien Armstrong                                             | Principal Investigator                              |
| Julie Brown                                                     | Research Nurse                                      |
| <b>Western Sussex Hospitals NHS Foundation Trust</b>            |                                                     |
| St Richard's Hospital, Worthing Hospital                        |                                                     |
| Dr Nicholas Brennan                                             | Principal Investigator                              |
| Dr Stuart Nicholls                                              | Previous Principal Investigator (Worthing Hospital) |
| <b>Wirral University Teaching Hospital NHS Foundation Trust</b> |                                                     |
| Arrowe Park Hospital                                            |                                                     |
| Dr Elizabeth Breen                                              | Principal Investigator                              |
| Sharon Hughes                                                   | Research Nurse                                      |
| Lucy Lewis                                                      | Research Nurse                                      |
| <b>Worcestershire Acute Hospitals NHS Trust</b>                 |                                                     |
| Alexandra Hospital, Worcestershire Royal Hospital               |                                                     |
| Dr John Scanlon                                                 | Principal Investigator                              |
| Dr Munir Ahmed                                                  | Clinician                                           |
| Dr Andrew Gallagher                                             | Clinician                                           |
| <b>Wrightington, Wigan And Leigh NHS Foundation Trust</b>       |                                                     |
| Royal Albert Edward Infirmary                                   |                                                     |
| Dr Vineeta Joshi                                                | Principal Investigator                              |
| Dr Madhumita Mukherjee                                          | Previous Principal Investigator                     |
| Dr Singara Velmurugan                                           | Previous Principal Investigator                     |

**Wye Valley NHS Trust**

The County Hospital

Dr Simon Meyrick

Principal Investigator

**Yeovil District Hospital NHS Foundation Trust**

Yeovil District Hospital

Dr Michael Fernando

Principal Investigator

Dr Christopher Zaborowski

Clinician

Alex Stannett

Research Nurse

**York Teaching Hospital NHS Foundation Trust**

Scarborough Hospital, The York Hospital

Dr Udupa Venkatesh

Principal Investigator (Scarborough  
Hospital)

Dr Guy Millman

Principal Investigator (The York Hospital)

Simon Dyer

Research Nurse (Scarborough Hospital)

Kerry Elliot

Research Nurse (Scarborough Hospital)
